# Supplementary material
Source: Research Square preprint supplement (doi:10.21203/rs.3.rs-9662371/v1)
Supplement: Supplementary file 1 [file f446da026e15df7ed7ddb6a9.docx]

**Supporting Information**


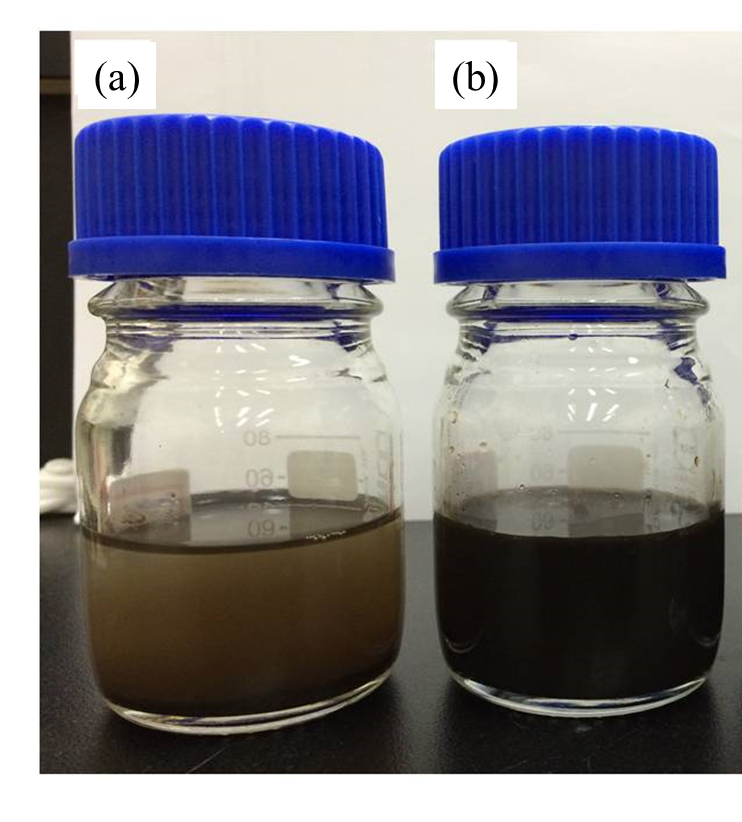


**Figure S1.** The photographs of (a) Fe3O4 MNP and (b) Fe3O4/HA MNP

**
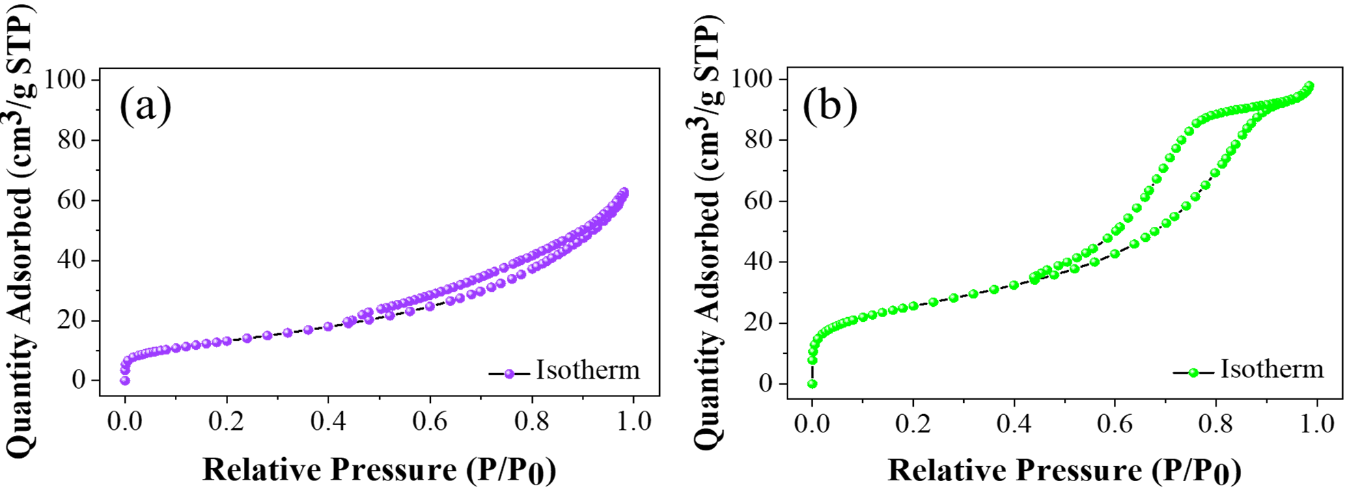
**

**Figure S2.** BET isotherms of (a) Fe3O4 MNP and (b) Fe3O4/HA MNP

**Table S1**. Removal efficiencies and the S/N of the Taguchi Method.

| **Run** | **Factor** | | | | **Removal efficiency** | | | | S/N |
| --- | --- | --- | --- | --- | --- | --- | --- | --- | --- |
| pH | MNP dosage  (g/L) | Time  (min) | Ionic conc.  (PO43-, SO42-, NO3-, Ca2+) | y1  (%) | y2  (%) | y3  (%) | Avg.  (y) |
| 1 | 3 | 1 | 30 | 20 | 92.6 | 92.6 | 93.5 | 92.9 | 39.4 |
| 2 | 3 | 3 | 80 | 40 | 92.0 | 92.3 | 93.0 | 92.4 | 39.3 |
| 3 | 3 | 5 | 130 | 60 | 92.8 | 93.1 | 93.8 | 93.2 | 39.4 |
| 4 | 3 | 7 | 180 | 80 | 93.4 | 92.2 | 91.8 | 92.5 | 39.3 |
| 5 | 5 | 1 | 30 | 60 | 92.4 | 92.4 | 92.8 | 92.5 | 39.3 |
| 6 | 5 | 3 | 80 | 80 | 90.8 | 89.9 | 90.1 | 90.3 | 39.1 |
| 7 | 5 | 5 | 180 | 20 | 94.6 | 94.3 | 94.0 | 94.3 | 39.5 |
| 8 | 5 | 7 | 130 | 40 | 93.1 | 92.7 | 93.2 | 93.0 | 39.4 |
| 9 | 7 | 1 | 130 | 80 | 87.9 | 88.9 | 89.1 | 88.6 | 39.0 |
| 10 | 7 | 3 | 180 | 60 | 92.5 | 93.5 | 92.2 | 92.7 | 39.3 |
| 11 | 7 | 5 | 30 | 40 | 92.2 | 93.3 | 91.9 | 92.5 | 39.3 |
| 12 | 7 | 7 | 80 | 20 | 93.7 | 93.8 | 93.6 | 93.7 | 39.4 |
| 13 | 9 | 1 | 180 | 40 | 88.8 | 87.5 | 88.2 | 88.2 | 38.9 |
| 14 | 9 | 3 | 130 | 20 | 88.3 | 88.3 | 89.8 | 88.8 | 39.0 |
| 15 | 9 | 5 | 80 | 80 | 92.0 | 92.2 | 92.3 | 92.2 | 39.3 |
| 16 | 9 | 7 | 30 | 60 | 91.2 | 91.0 | 90.2 | 90.8 | 39.2 |

**Table S2**. Average S/N ratios as the responses for each experimental factor in As(V) adsorption

| **Level** | **Factor** | | | |
| --- | --- | --- | --- | --- |
| pH | Adsorbent dosage | Time | Ionic conc. |
| Level 1 | 39.35 | 39.15 | 39.25 | 39.33 |
| Level 2 | 39.33 | 39.18 | 39.33 | 39.23 |
| Level 3 | 39.25 | 39.38 | 39.20 | 39.30 |
| Level 4 | 39.10 | 39.33 | 39.25 | 39.18 |
| S/N ratio  (S/Nmax - S/Nmin ) | 0.25 | 0.23 | 0.13 | 0.15 |
| Rank | 1 | 2 | 4 | 3 |

**Table S3**. Pseudo-second-order rate constants for As(V) adsorption onto adsorbents

| Adsorbent |  | Fe3O4/HA MNP | | |
| --- | --- | --- | --- | --- |
| Heavy metals |  | As(V) | | |
| MNP adsorbent (g/L) |  | 3 | | 5 |
| As(V) Conc. (mg/L) |  | 2 | 2 | |
| qe (mg/g) |  | 0.421 | | 0.452 |
| k2 (g/(mg⸳min)) |  | 0.156 | | 0.222 |
| t/qt (g⸳min/mg) |  | 445.2 | | 407.9 |
| R2 |  | 0.9823 | | 0.9934 |
